# Supplementary material for: TSLP Produced by Aspergillus fumigatus-Stimulated DCs Promotes a Th17 Response Through the JAK/STAT Signaling Pathway in Fungal Keratitis
Source: PubMed Central journal article supplement — Invest Ophthalmol Vis Sci. 2020 Dec 21;61(14):24. doi: 10.1167/iovs.61.14.24 (PMC7757613; doi:10.1167/iovs.61.14.24), 2020-12-21
Supplement: iovs-61-14-24_s001.pdf [file iovs-61-14-24_s001.pdf]

## **Supplementary Materials and Methods**

### ***Aspergillus fumigatus* strain and preparation of hyphae**

*A. fumigatus* strain CCTCC 93024 was purchased from the China Centre for Type Culture Collection and cultured on Sabouraud dextrose agar (213400, BD Bioscience, Franklin Lakes, NJ, USA) in an incubator for 7 days at 37°C. Hyphal fragments and conidia were harvested and planted into Sabouraud fluid media, and shaken at 26 °C for 18 h at 500 rpm. Next, the tubes were centrifuged at 1500 g for 10 min. For the in vitro study, the mycelia were washed twice and then suspended in PBS, followed by heat-inactivation at 56 °C for 60 min. They were then disrupted into 20- to 40-µm pieces with a tissue grinder and used at a density of  $1 \times 10^6$  pieces/mL. For the in vivo study, conidia and hyphae were diluted in phosphate-buffered saline (PBS) into  $2 \times 10^8$  pieces/mL and used at a density of  $1 \times 10^8$  pieces/mL.

### **RNA interference**

Specific siRNA oligonucleotides and negative control (NC) siRNA were designed and synthesized by GenePharma (Shanghai, China). The siRNA sequence pools targeting the coding region of TSLP and TSLPR are shown in the supplementary information. For the in vitro study, cells were seeded at  $2 \times 10^5$  cells/well in six-well plates in a normal growth medium; next, they were transfected with either 80 nm siRNA or NC siRNA for 48 h using Lipofectamine 2000 reagent (11668-019, Invitrogen, Waltham, MA, USA) following the manufacturer's recommendations. The gene silencing efficiency was verified by qRT-PCR and western blot. For the in vivo study, mice were anesthetized as previously described. TSLP siRNA or NC siRNA were diluted in sterile water to a

concentration of 10  $\mu\text{mol/L}$  each. One day before *A. fumigatus* infection, the mice were subconjunctivally injected with 5  $\mu\text{L}$  of either TSLP siRNA or NC siRNA.

### **Immunofluorescence Staining**

Eyeballs were excised from euthanized mice and embedded into the optimal cutting temperature (OCT) compound (Sakura, Torrance, CA, USA). Sections were cut into 6- $\mu\text{m}$  thick slices, mounted on polylysine-coated glass slides, fixed in 4% paraformaldehyde for 20 min, and then blocked with 2% bovine serum albumin (BSA) for 1 h at RT. Subsequently, slides were incubated with the primary antibody (1:100) overnight at 4  $^{\circ}\text{C}$ , and then incubated with the corresponding secondary antibody conjugated to FITC or TRITC (1:200, Beyotime) for 1 h at RT. The nuclei were counterstained with DAPI for 5 min in the dark. For the in vitro assay, cells were fixed with 4% paraformaldehyde for 15 min and blocked with 5% BSA for 1 h at RT; next, they were incubated with CD11c and TSLP antibodies, corresponding secondary antibody, and DAPI. Finally, slides were covered with antifade mounting medium and coverslips. Images were collected by fluorescence microscopy (X81, Olympus Optical, Tokyo, Japan).

### **High-throughput differential gene expression analysis**

The high-throughput mRNA-Seq experiments were conducted and analyzed by Biomarker Technologies (Beijing, China).

**Supplementary Figures:**

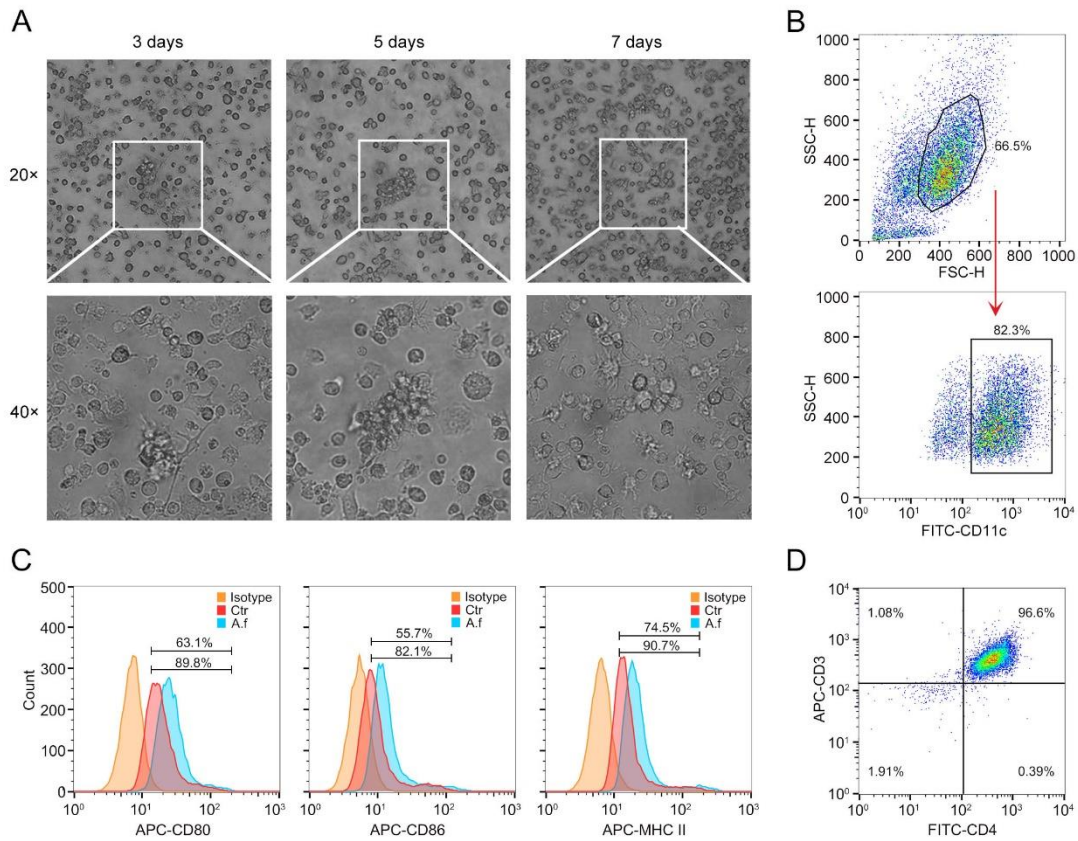

Figure S1. Identification of the morphology and concentration of DCs and CD4<sup>+</sup>T cells.

(A) Images of the DCs cultured at day 3, 5, and 7 showing the increase in cell number and change in cell morphology. The under panel are digitally magnified images of cells in this fraction with dendritic morphology. (B) Flow cytometry was performed to examine the surface expression of CD11c in DCs at the 5th day. Gating straight for flow cytometry was also shown. (C) DCs were cultured for 5 days, stimulated with *A. fumigatus* hyphae (10<sup>6</sup> pieces/mL) for 12 h. The surface expression of CD80, CD86, and MHC-II in CD11c<sup>+</sup> DCs was detected using flow cytometry. (D) Isolated CD4<sup>+</sup> T cells were stained with FITC-CD4 and APC-CD3, flow cytometry was performed to detect the surface expression of CD4 and CD3.

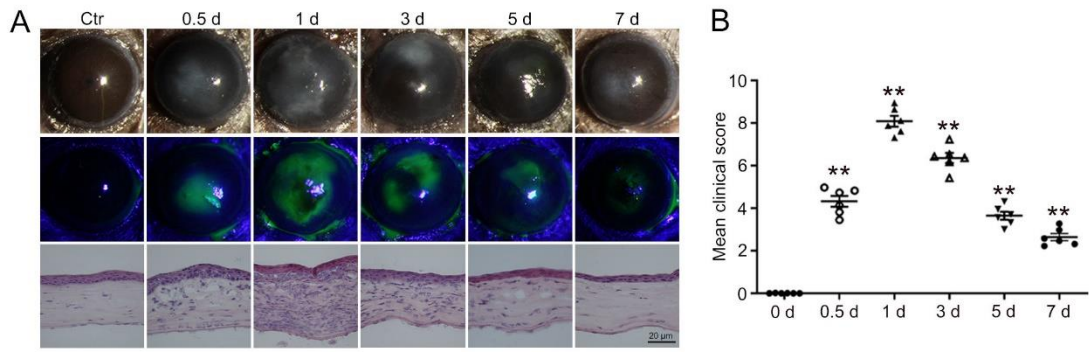

Figure S2. C57BL/6 mice corneas were scratched with 26-gauge needles followed by treatment with *A. fumigatus* for 0.5, 1, 3, 5, and 7 days. (A) The severities of keratitis were assessed by slit-lamp examination, fluorescein staining, and H&E staining at 0.5, 1, 3, 5, and 7 days post-infection. Scale bar: 20  $\mu$ M. (B) Clinical scores were calculated to assess the clinical manifestation in (A). (Data are mean  $\pm$  SEM, \* $p$  < 0.05, \*\* $p$  < 0.01, n = 6).

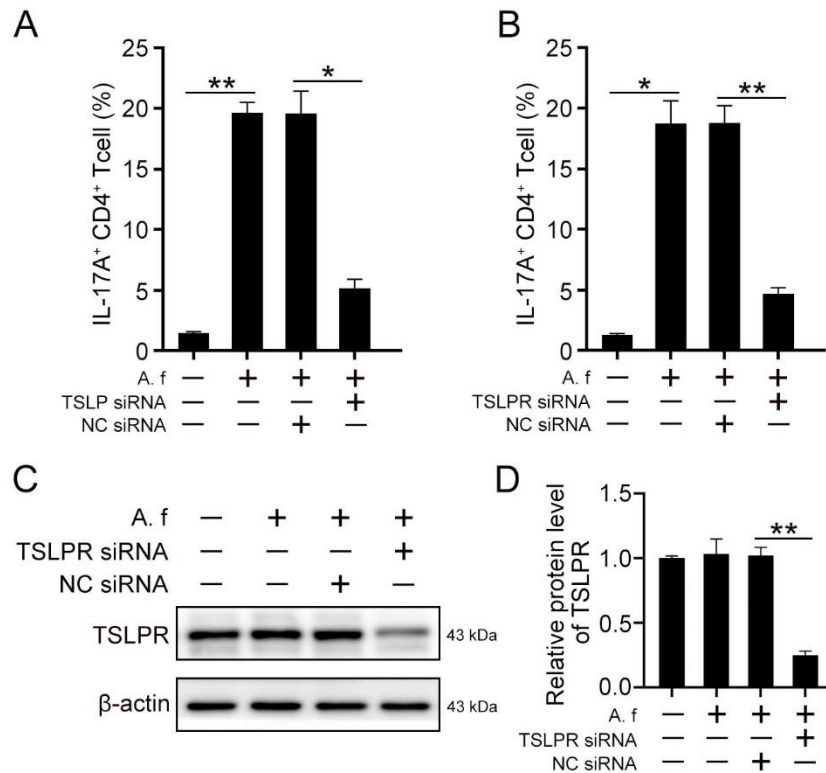

Figure S3. (A) Quantification of IL-17A level in Figure 4F. (B) Quantification of IL-17A level in Figure 4H. (C) CD4<sup>+</sup> T cells were incubated with TSLPR siRNA (80 nM) or NC siRNA for 24 h, then co-cultured with *A. fumigatus*-stimulated DCs for 4 days. Western blot was performed to detect the protein levels of IL-17A and  $\beta$ -actin in CD4<sup>+</sup> T cells. (D) Quantification of TSLPR level in (C). (Data are mean  $\pm$  SEM, \* $p$  < 0.05, \*\* $p$  < 0.01, n = 3).

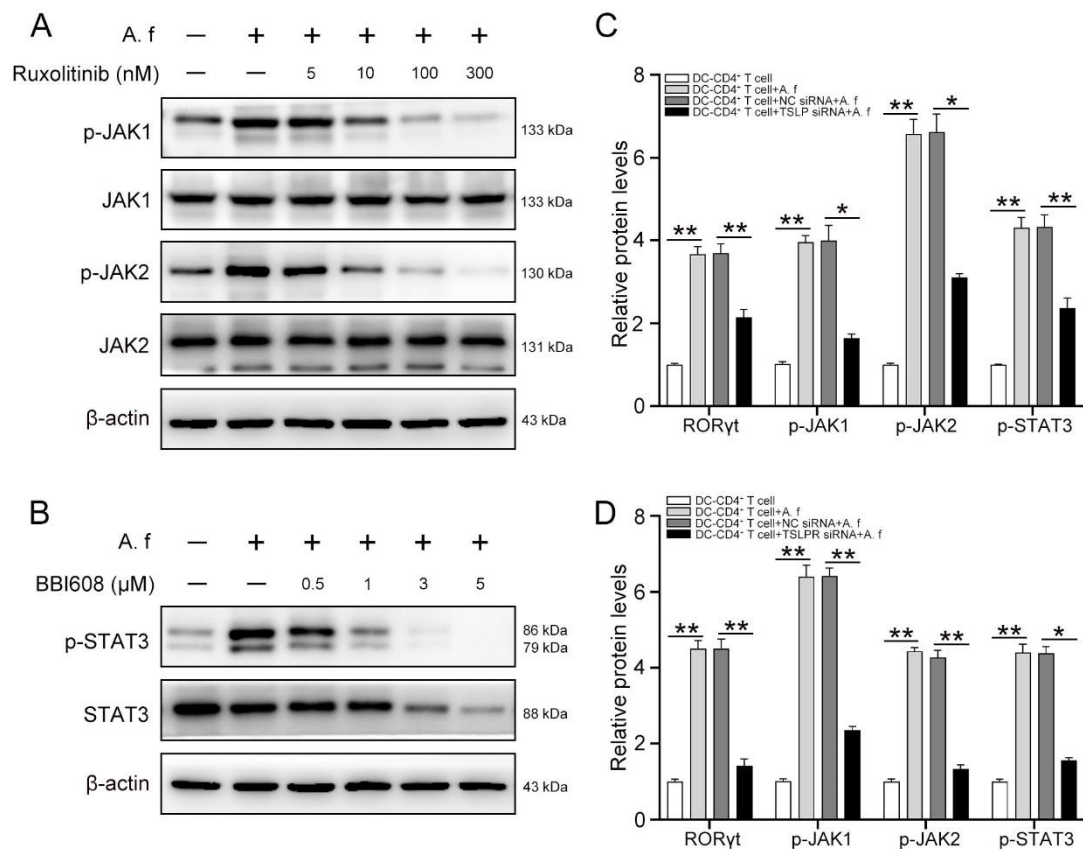

Figure S4. CD4<sup>+</sup> T cells co-cultured with *A. fumigatus*-stimulated DCs were treated with different concentration of ruxolitinib (5, 10, 100, and 300 nM) or BBI608 (0.5, 1, 3, and 5  $\mu$ M) for 4 days. (A) Western blot was performed to determine the protein levels of p-JAK1, JAK1, p-JAK2, JAK2, and  $\beta$ -actin in CD4<sup>+</sup> T cells. (B) Western blot was performed to determine the protein levels of p-STAT3, STAT3, and  $\beta$ -actin in CD4<sup>+</sup> T

cells. (C) Quantification of relative protein levels of p-STAT3, p-JAK1, p-JAK2, and ROR $\gamma$ t in Figure 6E. (D) Quantification of relative protein levels of p-STAT3, p-JAK1, p-JAK2, and ROR $\gamma$ t in Figure 6F. (Data are mean  $\pm$  SEM, \* $p$  < 0.05, \*\* $p$  < 0.01, n = 3).

**Table S1. siRNA sequences used for RNA interference and Primer sequences used for qRT-PCR**

| Gene    | siRNA sequences (5' to 3')  |
|---------|-----------------------------|
| TSLP-1  | CACAAGAAGUCCAAAACAU         |
| TSLP-2  | GGGAGAAACUGCUGAGAUC         |
| TSLP-3  | CCUCACAAAUUCUAAGAUU         |
| TSLPR-1 | GGACCGAACCAGCUGUCAAUUC      |
| TSLPR-2 | GGACCGAGGAGGAAGAUGACC       |
| TSLPR-3 | GCAAAUGUGGUCACAAAUAUU       |
| Gene    | Primer sequences (5' to 3') |
| GADPH-F | CATCACTGCCACCCAGAAGACTG     |
| GADPH-R | ATGCCAGTGAGCTTCCCGTTCAG     |
| TSLP-F  | GCAAATCGAGGACTGTGAGAGC      |
| TSLP-R  | TGAGGGCTTCTCTTGTTCTCCG      |
| IL-6-F  | TACCACTTCACAAGTCGGAGGC      |
| IL-6-R  | CTGCAAGTGCATCATCGTTGTTC     |

|                 |                         |
|-----------------|-------------------------|
| IL-23-F         | CATGCTAGCCTGGAACGCACAT  |
| IL-23-R         | ACTGGCTGTTGTCCTTGAGTCC  |
| IL-1 $\beta$ -F | CCTTCCAGGATGAGGACATGA   |
| IL-1 $\beta$ -R | TGAGTCACAGAGGATGGGCTC   |
| IL-17A-F        | CAGACTACCTCAACCGTTCCAC  |
| IL-17A-R        | TCCAGCTTTCCTCCGCATTGA   |
| IL-17F-F        | AACCAGGGCATTCTGTCCCAC   |
| IL-17F-R        | GGCATTGATGCAGCCTGAGTGT  |
| IL-22-F         | GCTTGAGGTGTCCAACCTCCAG  |
| IL-22-R         | ACTCCTCGGAACAGTTTCTCCC  |
| Bcl2-F          | CCTGTGGATGACTGAGTACCTG  |
| Bcl2-R          | AGCCAGGAGAAATCAAACAGAGG |
| Bcl2l1-F        | GCCACCTATCTGAATGACCACC  |
| Bcl2l1-R        | AGGAACCAGCGGTTGAAGCGC   |
| Socs3-F         | GGACCAAGAACCTACGCATCCA  |
| Socs3-R         | CACCAGCTTGAGTACACAGTCG  |
| Socs1-F         | AGTCGCCAACGGAAGTCTTCT   |
| Socs1-R         | GTAGTGCTCCAGCAGCTCGAAA  |
| Il21r-F         | CACTGACTACCTCTGGACCATC  |
| Il21r-R         | GCAGAAGGTCTCTTGGTCCTGA  |
| Stat5a-F        | CCTGTTTGAGTCTCAGTTCAGCG |

|          |                          |
|----------|--------------------------|
| Stat5a-R | TGGCAGTAGCATTGTGGTCCTG   |
| Lif-F    | TCAACTGGCACAGCTCAATGGC   |
| Lif-R    | GGAAGTCTGTCATGTTAGGCGC   |
| Lta-F    | AGCCCATCCACTCCCTCAGAAG   |
| Lta-R    | TGCTCTCCAGAGCAGTGAGTTC   |
| Vegfa-F  | CTGCTGTAACGATGAAGCCCTG   |
| Vegfa-R  | GCTGTAGGAAGCTCATCTCTCC   |
| Ccr7-F   | AGAGGCTCAAGACCATGACGGA   |
| Ccr7-R   | TCCAGGACTTGGCTTCGCTGTA   |
| CD40-F   | ACCAGCAAGGATTGCGAGGCAT   |
| CD40-R   | GGATGACAGACGGTATCAGTGG   |
| IL-4-F   | ATCATCGGCATTTTGAACGAGGTC |
| IL-4-R   | ACCTTGGAAGCCCTACAGACGA   |
| IL-5-F   | GATGAGGCTTCCTGTCCCTACT   |
| IL-5-R   | TGACAGGTTTTTGAATAGCATTTC |
| Ccl4-F   | ACCCTCCCCTTCCTGCTGTTT    |
| Ccl4-R   | CTGTCTGCCTCTTTTGGTCAGG   |
| Ifng-F   | CAGCAACAGCAAGGCGAAAAAGG  |
| Ifng-R   | TTTCCGCTTCCTGAGGCTGGAT   |
| IL-9-F   | TCCACCGTCAAAATGCAGCTGC   |
| IL-9-R   | CCGATGGAAAACAGGCAAGAGTC  |
| IL-10-F  | CGGGAAGACAATAACTGCACCC   |



|          |                         |
|----------|-------------------------|
| IL-10-R  | CGGTTAGCAGTATGTTGTCCAGC |
| IL-21-F  | GCCTCCTGATTAGACTTCGTCAC |
| IL-21-R  | CAGGCAAAAGCTGCATGCTCAC  |
| IL-21r-F | CACTGACTACCTCTGGACCATC  |
| IL-21r-R | GCAGAAGGTCTCTTGGTCCTGA  |

1. Gao, N., et al., *Dendritic cell-epithelium interplay is a determinant factor for corneal epithelial wound repair*. Am J Pathol, 2011. **179**(5): p. 2243-53.
